# Supplementary material for: Factor Structure of the Social Phobia and Anxiety Inventory for Children in an Irish Adolescent Population
Source: Atypon-hosted journal article supplement (doi:10.1027/1015-5759/a000420), 2017-06-28
Supplement: 1015-5759_a000420_esm1.pdf [file 1015-5759_a000420_esm1.pdf]

Table. *Previously published factor solutions for the SPAI-C*

| <b>Publication</b>      | <b>Country</b> | <b>Sample Characteristics</b>                                      | <b>Method</b>                               | <b>Factors and Items Included</b>                                                                                                                                                                                                                                                                                                                                                     | <b>Excluded Items</b> |
|-------------------------|----------------|--------------------------------------------------------------------|---------------------------------------------|---------------------------------------------------------------------------------------------------------------------------------------------------------------------------------------------------------------------------------------------------------------------------------------------------------------------------------------------------------------------------------------|-----------------------|
| Beidel et al. (1995)    | USA            | Combined Sample<br>(Clinical and Control)<br>N = 154<br>8-17 years | PCA                                         | <i>Assertiveness/General Conversation</i> : 2, 8, 9, 10, 11, 12, 13, 14, 15, 18, 19, 21, 24<br><i>Traditional Social Encounters</i> : 6, 9, 17, 19, 20, 21, 24, 25, 26<br><i>Public Performance</i> : 1, 2, 3, 4, 5, 16, 17                                                                                                                                                           | 7, 22, 23             |
| Beidel et al. (1996)*   | USA            | Combined Sample<br>(Clinical and Non-clinical)                     | PCA                                         | <i>Assertiveness</i> : 8, 10, 11, 12, 13, 17, 18<br><i>General Conversation</i> : 1, 3, 7, 14, 15, 16<br><i>Physical and Cognitive Symptoms</i> : 21, 24, 25, 26<br><i>Avoidance</i> : 2, 6, 19, 20<br><i>Public Performance</i> : 3, 4, 5, 16                                                                                                                                        | 9, 22, 23             |
| Gauer et al. (2005)     | Brazil         | Community Sample<br>N = 1,871<br>9-14 years                        | Factor analysis<br>with varimax<br>rotation | <i>Assertiveness</i> : 2, 10, 11, 12, 13, 18<br><i>Avoidance/Social Encounters</i> : 6, 7, 9, 14, 15, 19, 20<br><i>Public Performance</i> : 1, 3, 4, 5, 8, 16, 17<br><i>Physical and Cognitive Symptoms</i> : 21, 22, 24, 25, 26                                                                                                                                                      | 23                    |
| Aune et al. (2008)      | Norway         | Community Sample<br>N = 1,439<br>11-14 years                       | EFA and CFA                                 | <i>Assertiveness</i> : 10, 11, 12, 13, 18<br><i>Physical/Cognitive Symptoms</i> : 21, 22, 25, 26<br><i>Public Performance</i> : 2, 3, 4, 5, 8, 16<br><i>Social Encounters</i> : 6, 7, 9<br><i>Avoidance</i> : 19, 20                                                                                                                                                                  | 1, 14, 15, 17, 23, 24 |
| Olivares et al. (2010)  | Spain          | Community Sample<br>N = 1,588<br>10-17 years                       | CFA                                         | <i>Public Performance</i> : 1, 2, 3, 4, 5, 8, 16<br><i>Assertiveness</i> : 2, 10, 11, 12, 13, 17, 18, 23<br><i>Fear and Avoidance/Escape in Social Encounters</i> : 6, 7, 9, 14, 15, 19, 20, 22<br><i>Cognitive and Psychophysiological Interferences</i> : 21, 22, 24, 25, 26                                                                                                        | n/a                   |
| Ogliari et al. (2012)** | Italy          | Community Sample<br>N = 228<br>8-11 years                          | CFA                                         | <i>Assertiveness</i> : 8, 10, 11, 12, 13, 17, 18<br><i>General Conversation</i> : 1, 7, 14, 15<br><i>Physical/Cognitive Symptoms</i> : 21, 24, 25, 26<br><i>Avoidance</i> : 6, 10, 19, 20<br><i>Public Performance</i> : 3, 4, 5, 16<br>A hierarchical model with 5 first-order factors in which the 5 factors were predicted by a second-order social phobia factor was also tested. | 2, 9, 22, 23          |
| Cederlund & Öst (2013)  | Sweden         | Clinical Sample<br>N = 59<br>8-14 years                            | EFA                                         | <i>Fear of Social Interactions/Social Encounters</i> : 9, 10, 11, 12, 13, 14, 15, 18, 19<br><i>Public Performance</i> : 2, 4, 5, 8, 17<br><i>Symptoms</i> : 1, 7, 21, 22, 23, 24, 25, 26                                                                                                                                                                                              | 3, 6, 16, 20          |

*Notes:* \*Storch et al. (2004) also reported that the Beidel et al. (1996) five-factor solution was an adequate fit for their data from a community sample of 13-17 year olds in the USA using CFA ( $N = 1,147$ ) \*\*Hierarchical model proposed by Ogliari et al. (2012).
